# Supplementary material
Source: PubMed Central journal article supplement (PMC5848507)

Figure 1

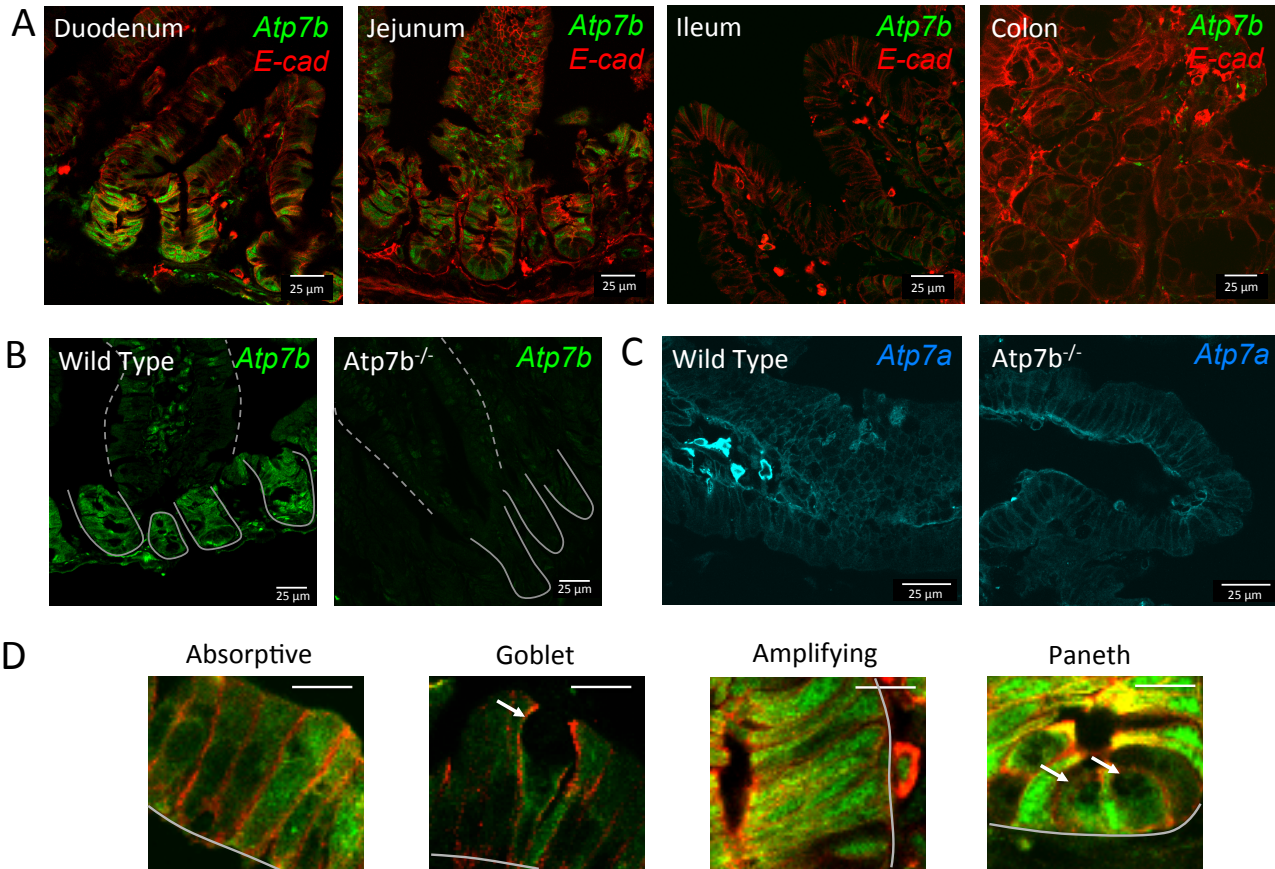

Supplement: NIHMS909453-supplement-1.pdf [file NIHMS909453-supplement-1.pdf]

Figure 3

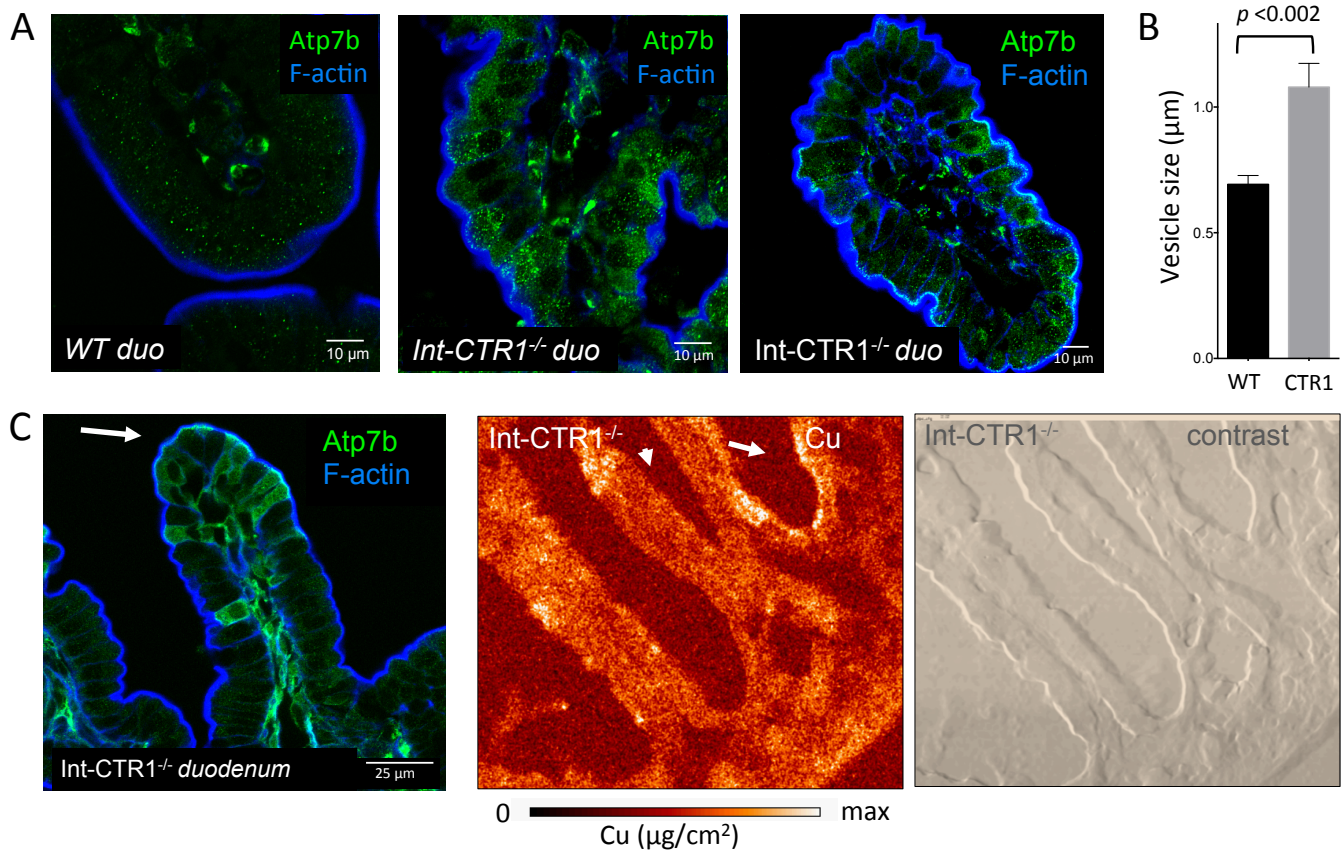

Supplement: NIHMS909453-supplement-3.pdf [file NIHMS909453-supplement-3.pdf]

Figure 4

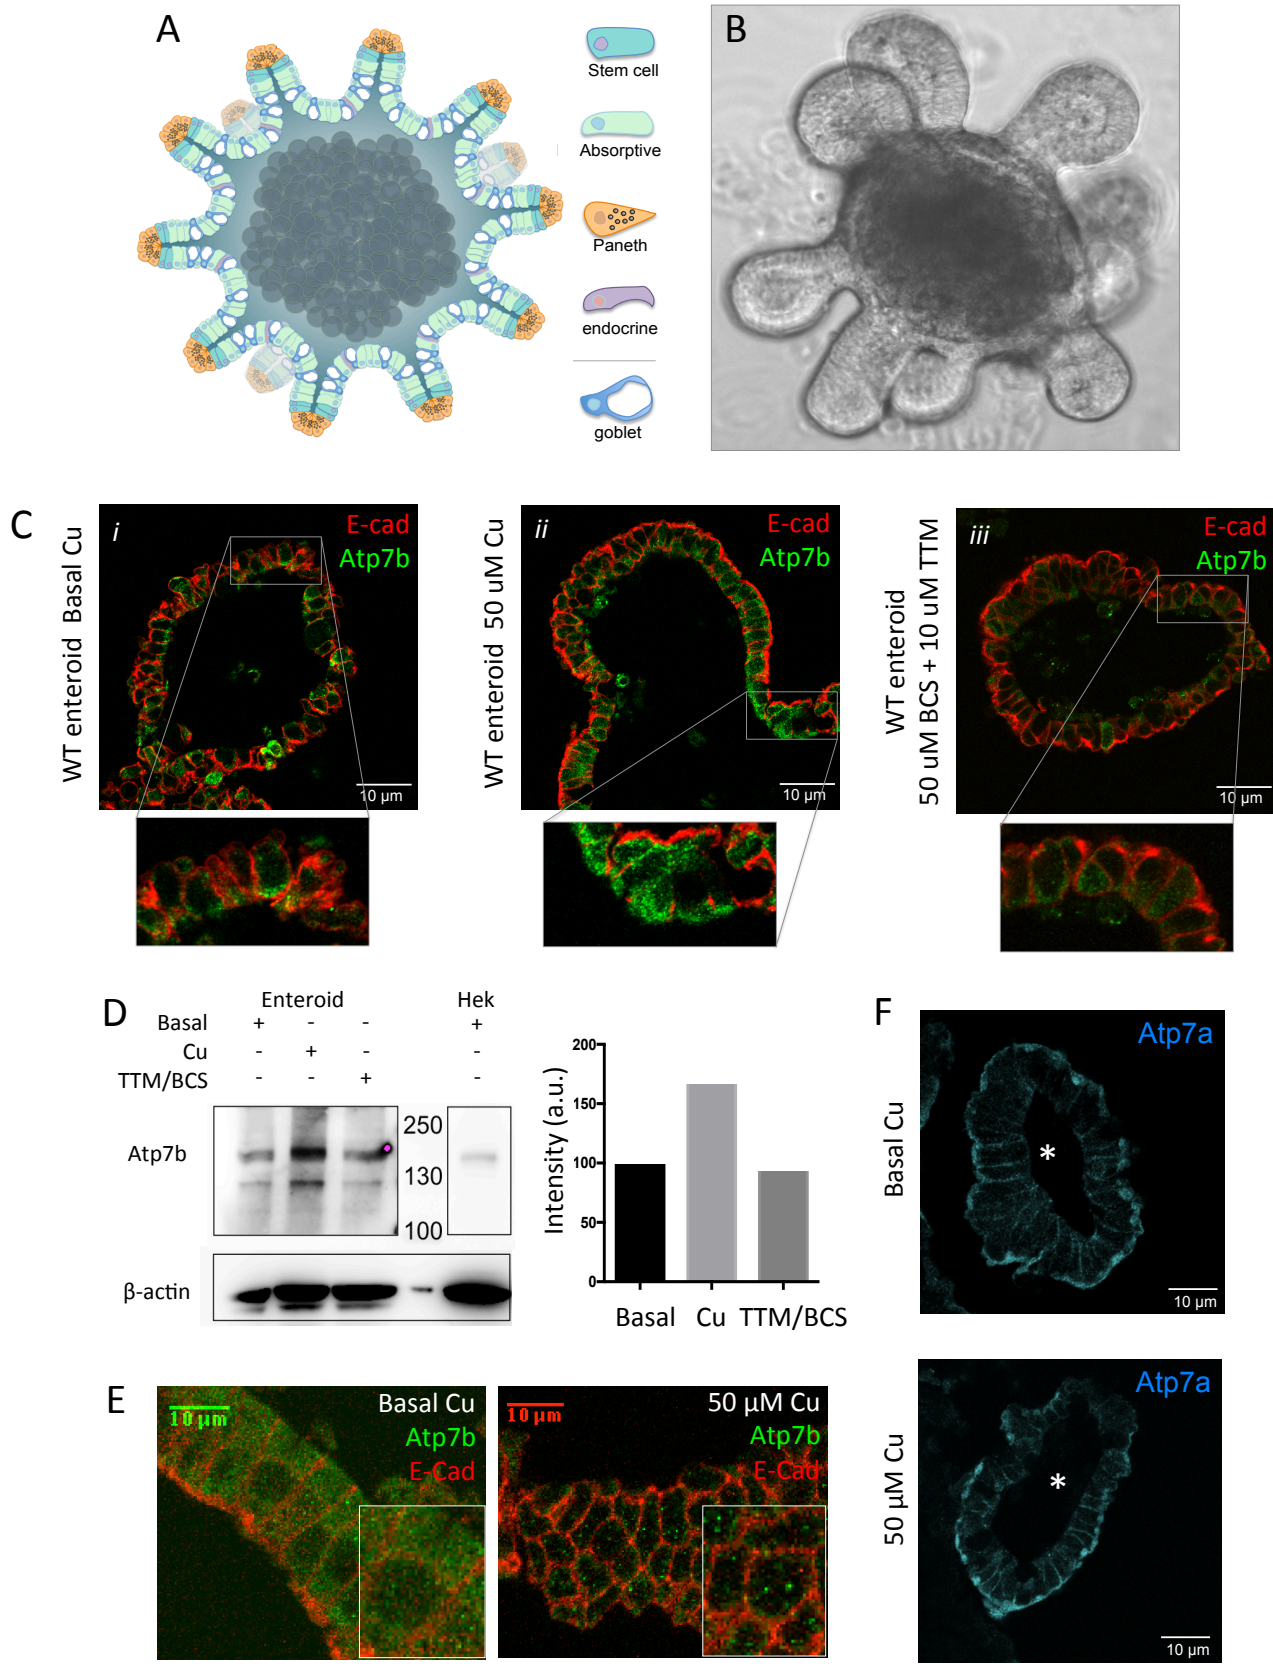

Supplement: NIHMS909453-supplement-4.pdf [file NIHMS909453-supplement-4.pdf]

Figure 5

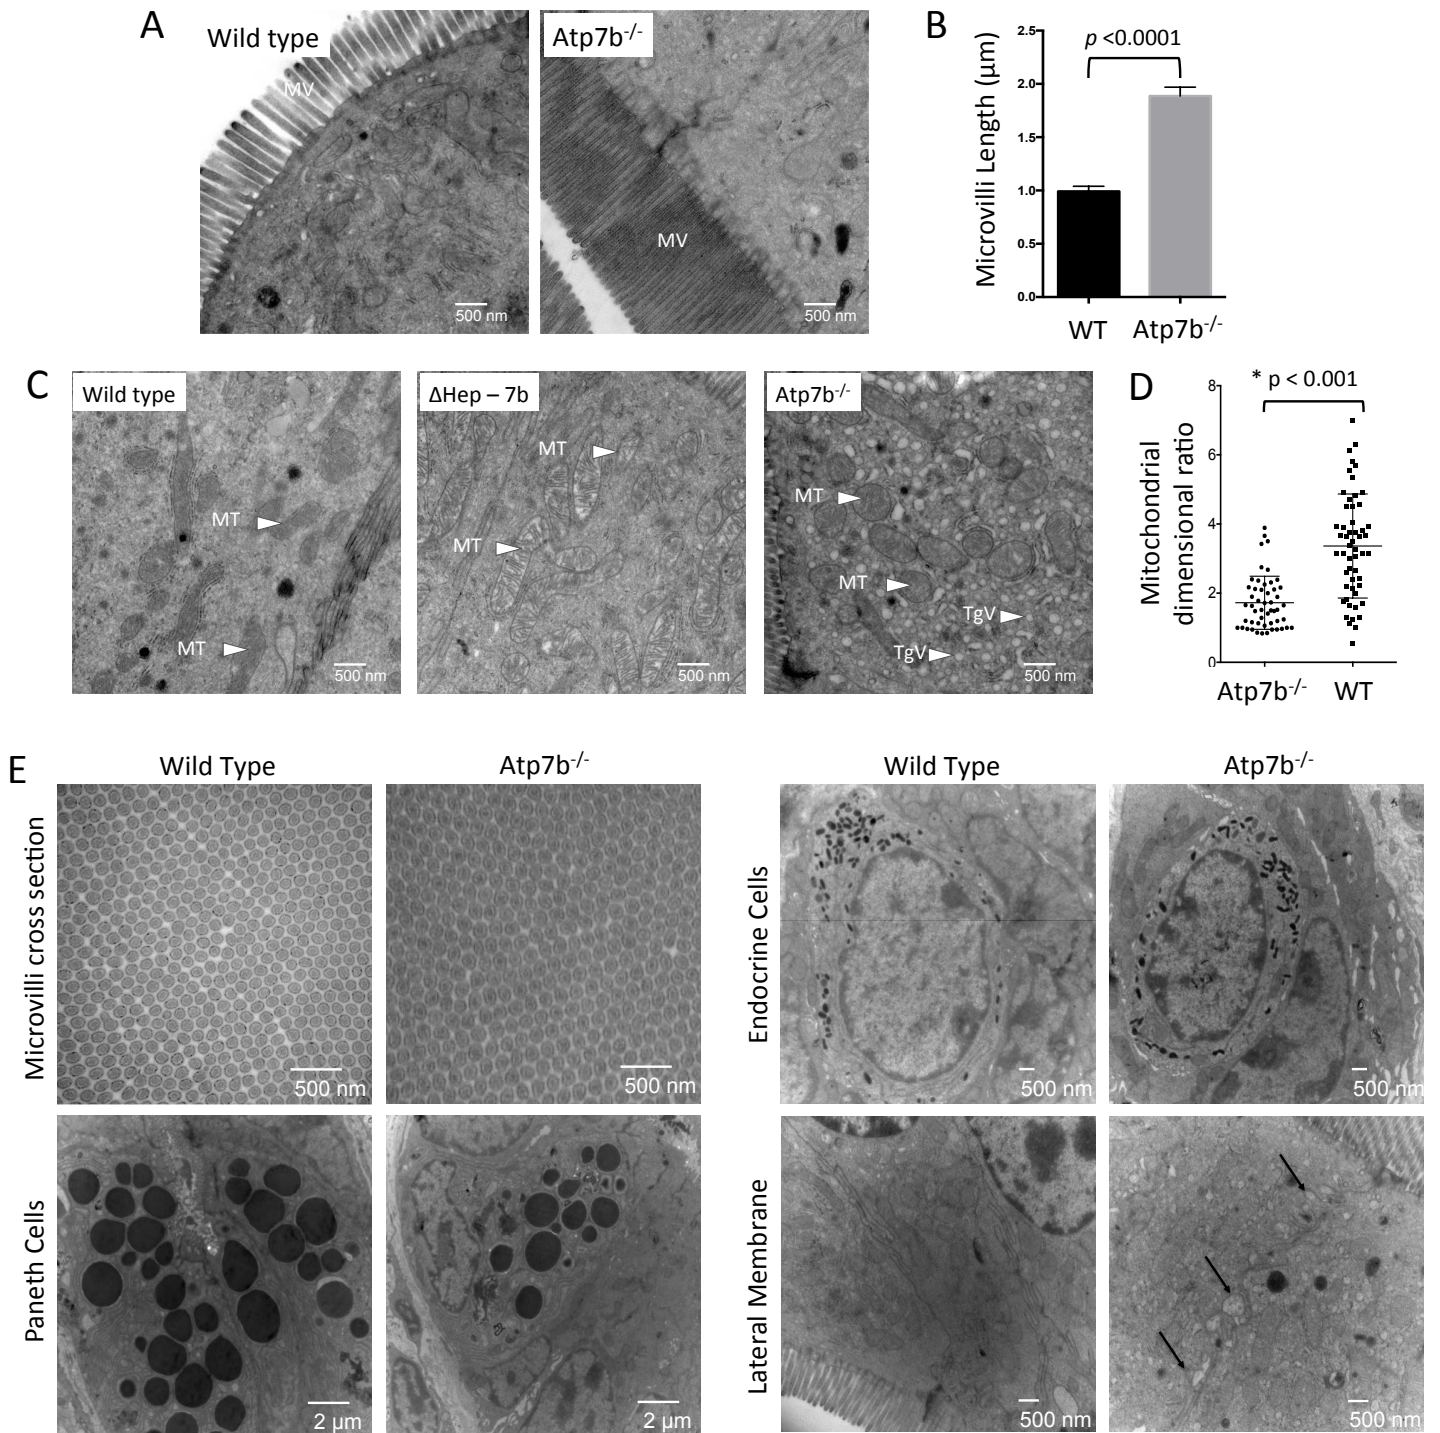

Supplement: NIHMS909453-supplement-5.pdf [file NIHMS909453-supplement-5.pdf]

Figure 6

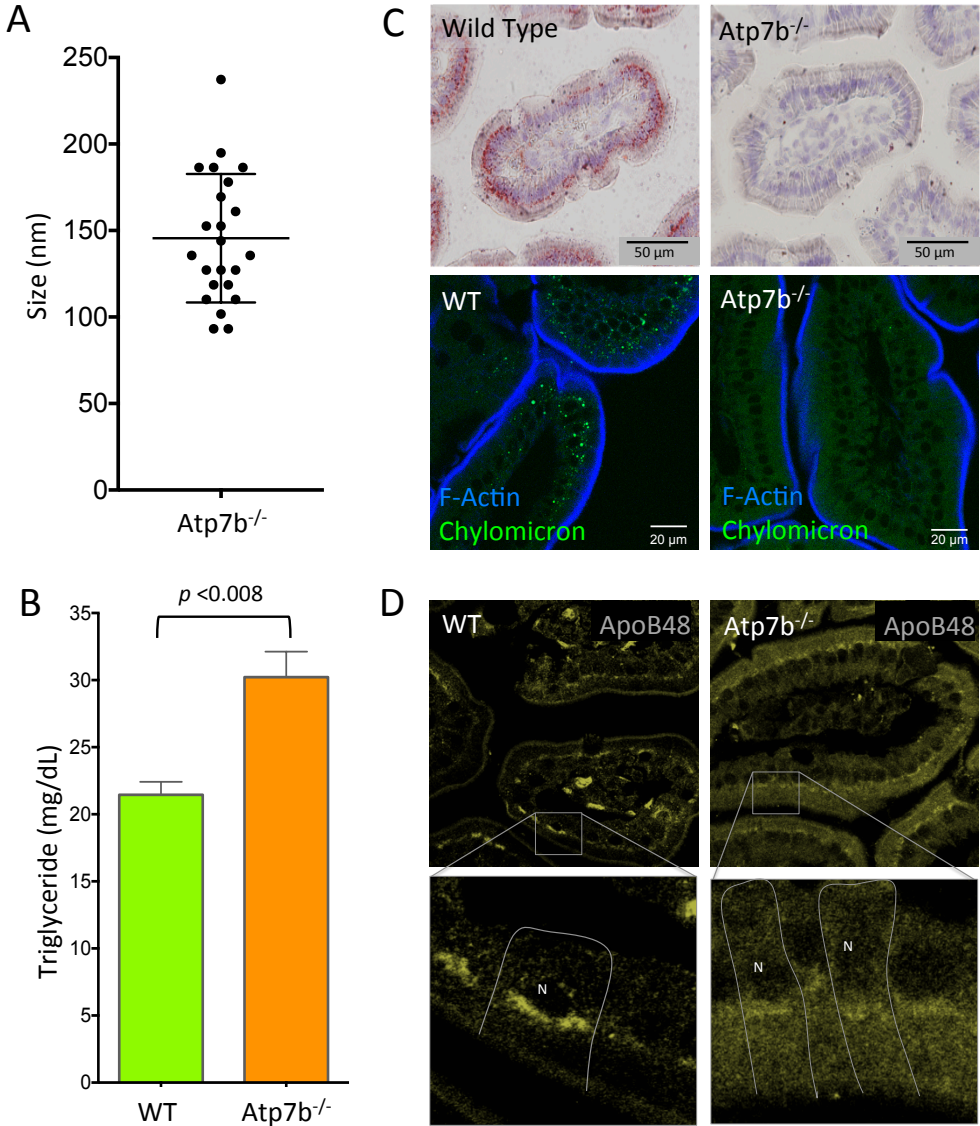

Supplement: NIHMS909453-supplement-6.pdf [file NIHMS909453-supplement-6.pdf]

Supplemental Figure 2

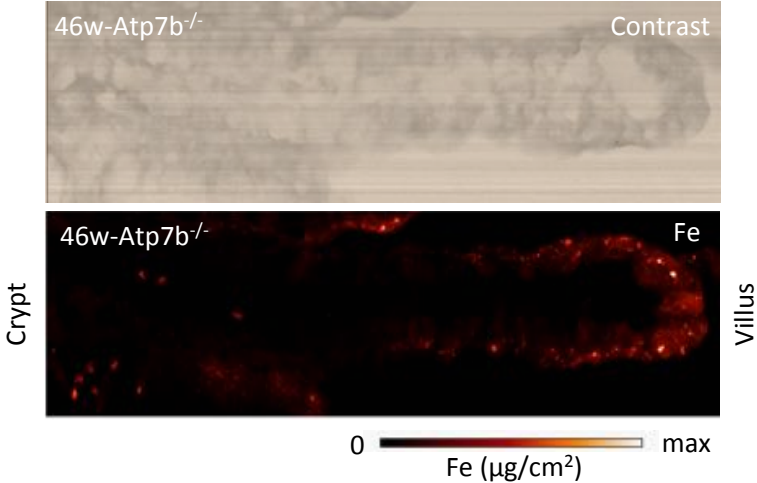

Supplement: NIHMS909453-supplement-S2.pdf [file NIHMS909453-supplement-S2.pdf]

Supplemental Figure 3

Wild Type

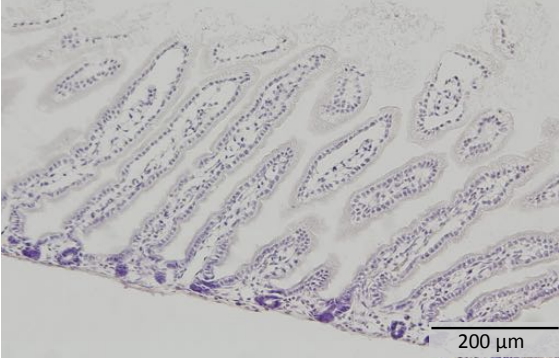

Int-CTR1<sup>-/-</sup>

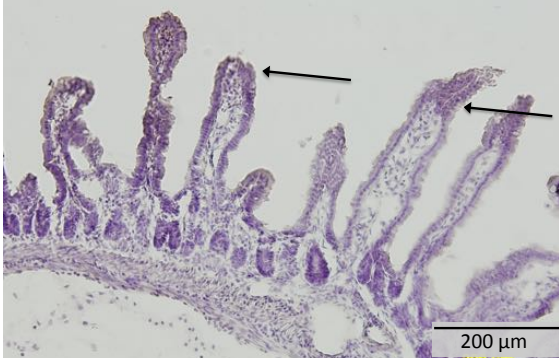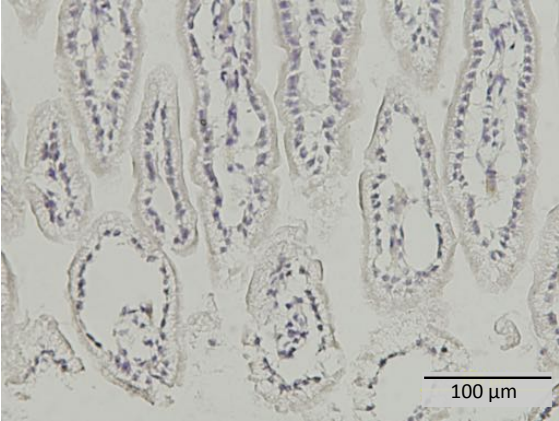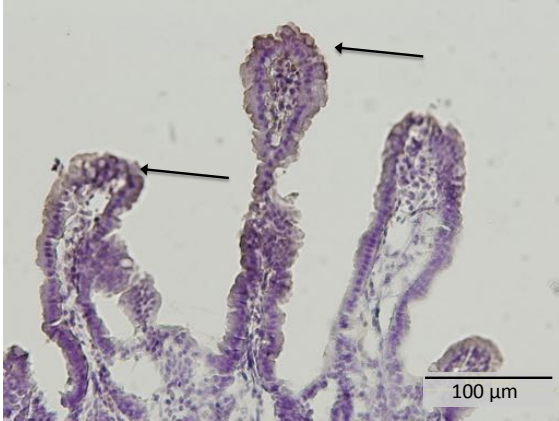

Supplement: NIHMS909453-supplement-S3.pdf [file NIHMS909453-supplement-S3.pdf]

Supplemental Figure 4

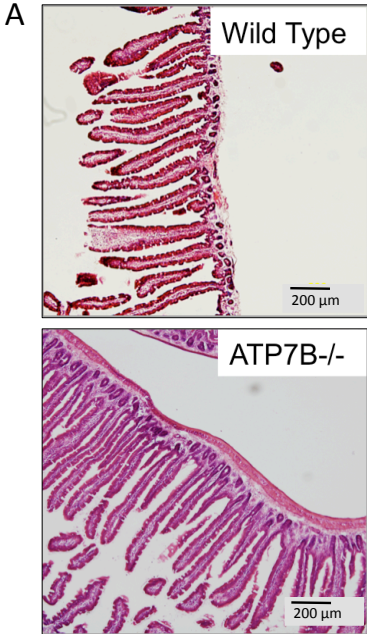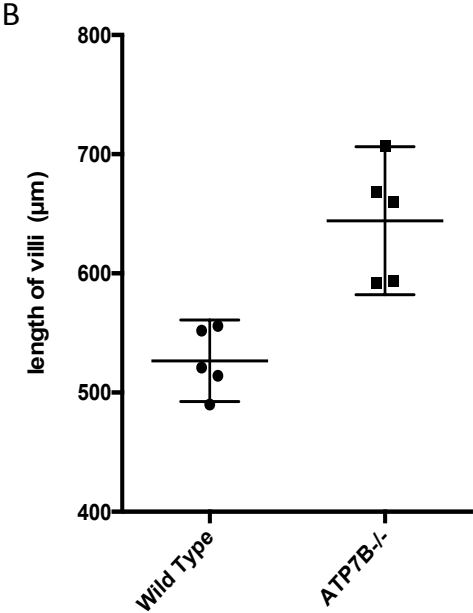

Supplement: NIHMS909453-supplement-S4.pdf [file NIHMS909453-supplement-S4.pdf]

Supplemental Figure 5

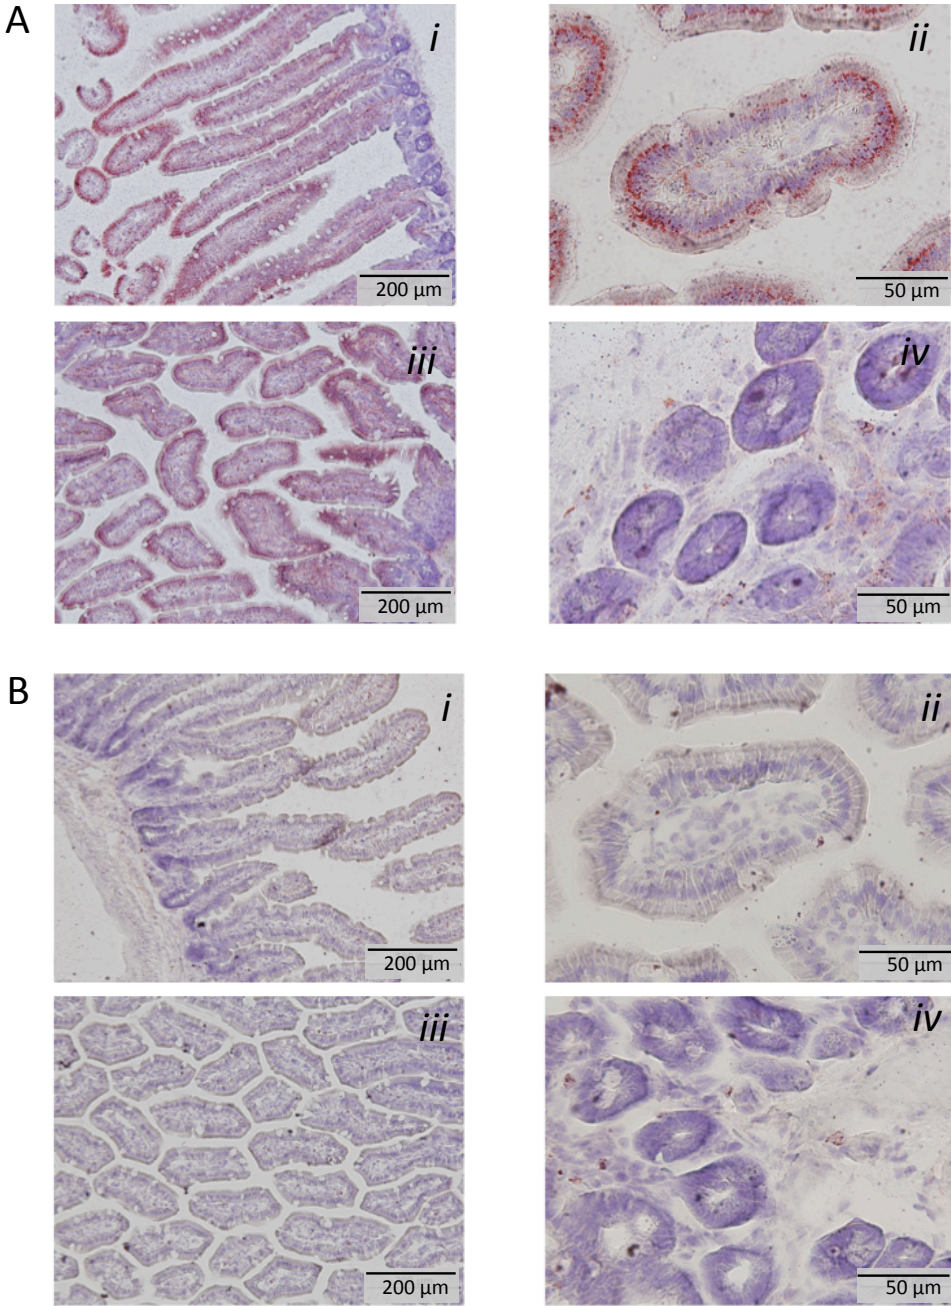

Supplement: NIHMS909453-supplement-S5.pdf [file NIHMS909453-supplement-S5.pdf]

Supplemental Figure 6

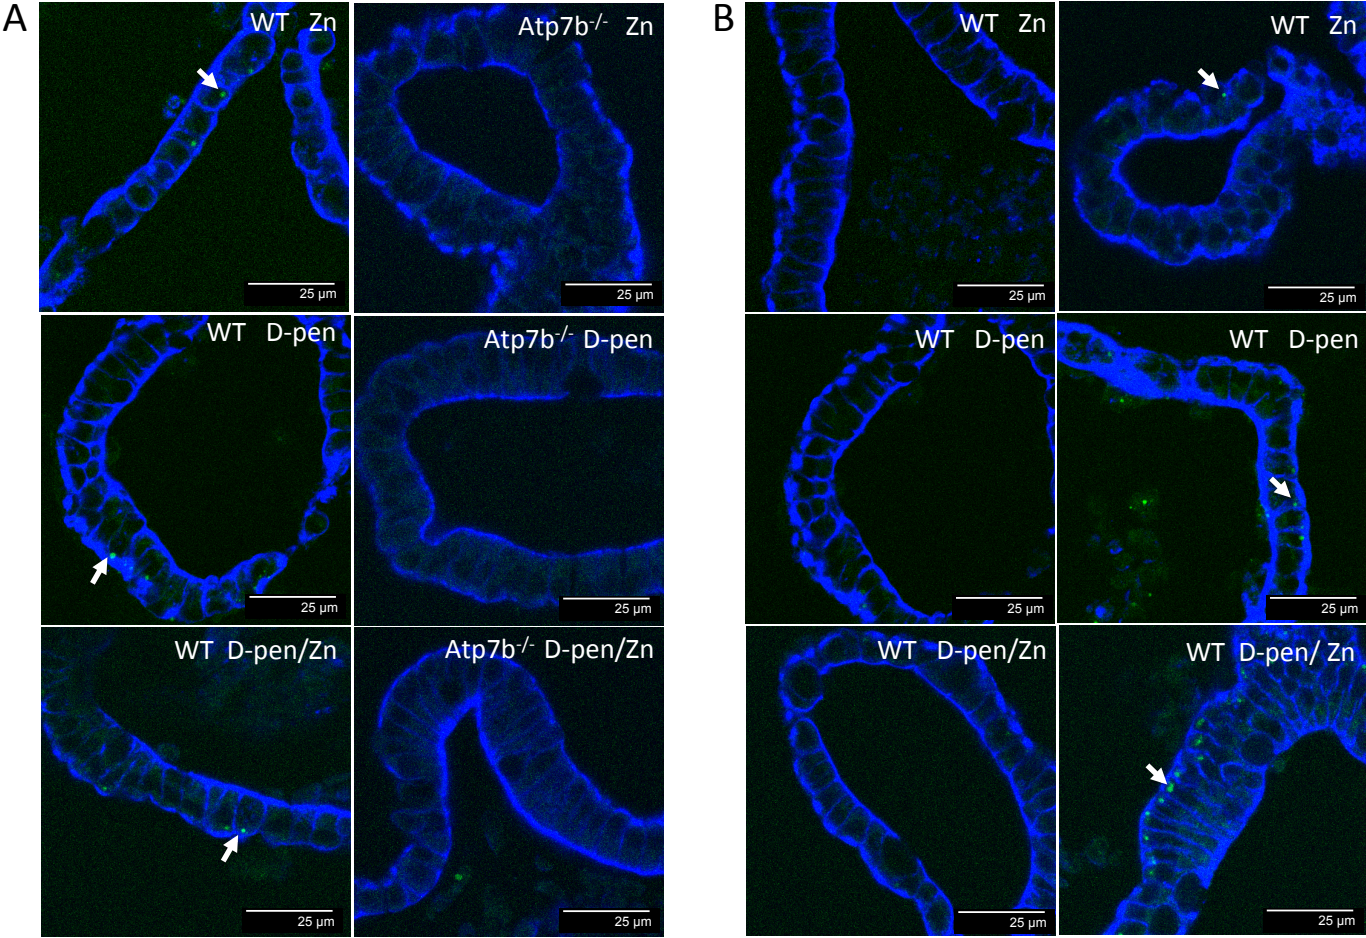

Supplement: NIHMS909453-supplement-S6.pdf [file NIHMS909453-supplement-S6.pdf]
